# Supplementary material
Source: PubMed Central journal article supplement (PMC4789594)

**Appendix 1.** Electrocardiography rhythm strip test and answer sheet

Name: \_\_\_\_\_

## **ECG Rhythm Strips**

### *Answer Sheet*

**Enter the letter preceding the ECG strip in the blank preceding the correct ECG rhythm description.**

### **ECG Rhythm Description**

- \_\_\_\_\_ Normal sinus rhythm
- \_\_\_\_\_ Sinus bradycardia
- \_\_\_\_\_ Sinus tachycardia
- \_\_\_\_\_ Sinus rhythm with first-degree AV block
- \_\_\_\_\_ Sinus rhythm with second-degree AV block (Mobitz type I Wencheback)
- \_\_\_\_\_ Sinus rhythm with second-degree AV block (Mobitz type II)
- \_\_\_\_\_ Sinus rhythm with third-degree AV block
- \_\_\_\_\_ Multi-focal atrial tachycardia (frequent premature atrial contractions)
- \_\_\_\_\_ Atrial flutter
- \_\_\_\_\_ Atrial fibrillation
- \_\_\_\_\_ Junctional rhythm
- \_\_\_\_\_ Sinus bradycardia with unifocal PVC's
- \_\_\_\_\_ Ventricular bigeminy
- \_\_\_\_\_ Sinus tachycardia with multifocal PVC's
- \_\_\_\_\_ Sinus tachycardia with unifocal PVC's and couplets
- \_\_\_\_\_ Sinus rhythm with paroxysmal ventricular tachycardia
- \_\_\_\_\_ Sustained Ventricular tachycardia
- \_\_\_\_\_ Agonal rhythm
- \_\_\_\_\_ Ventricular fibrillation
- \_\_\_\_\_ Artifact

American Heart Association  
ADVANCED CARDIAC LIFE SUPPORT

**ECG Rhythm Strips**

1. Examine each strip closely.
2. Select the single best ECG rhythm description from the Answer Sheet and enter the letter preceding the strip by that description.

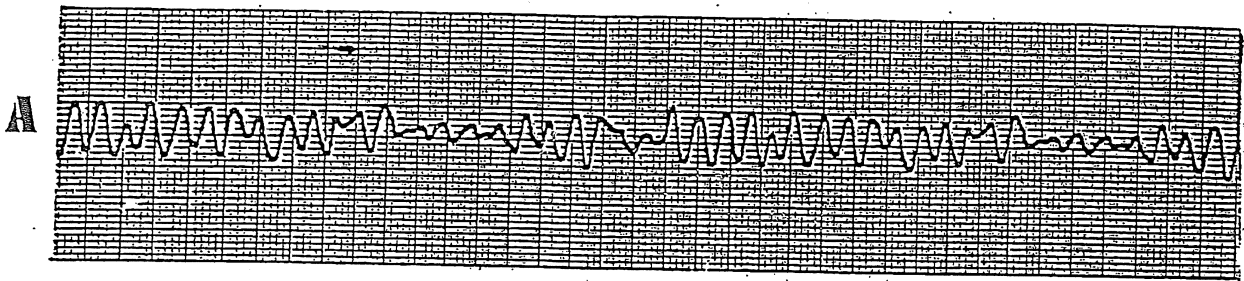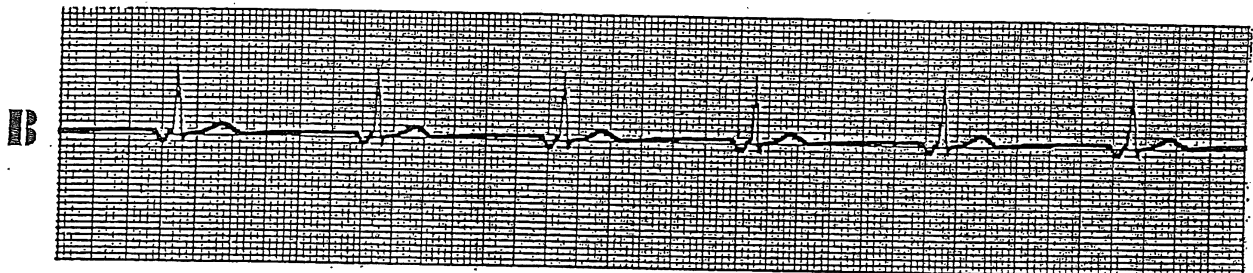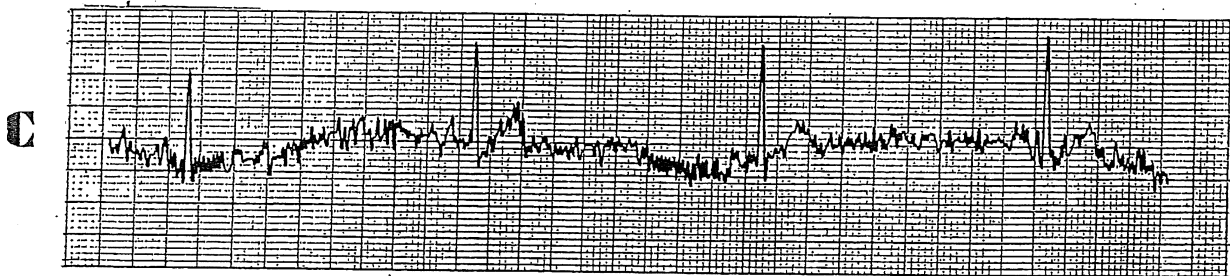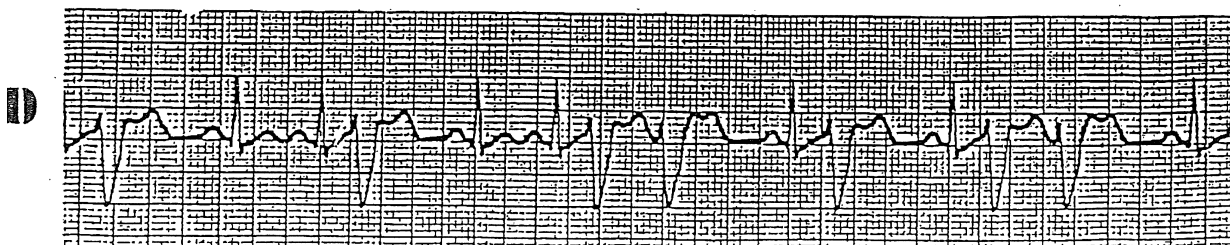

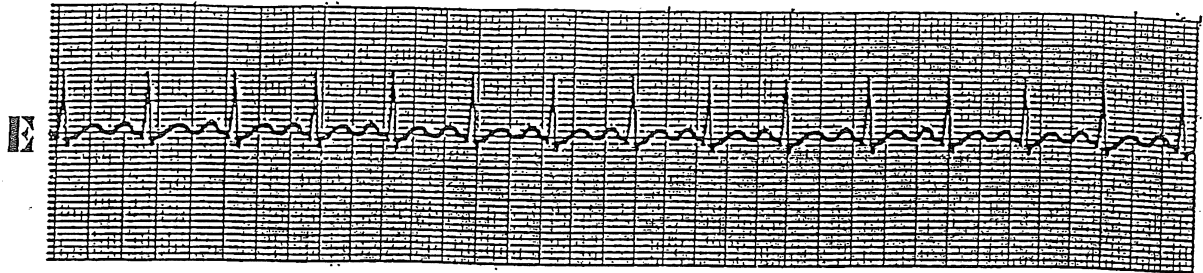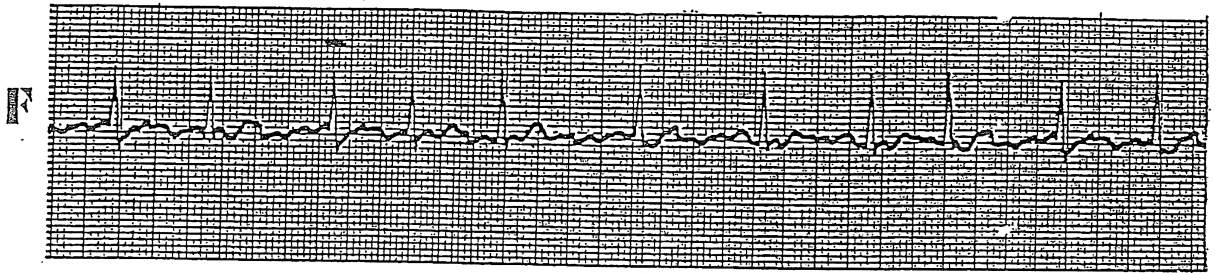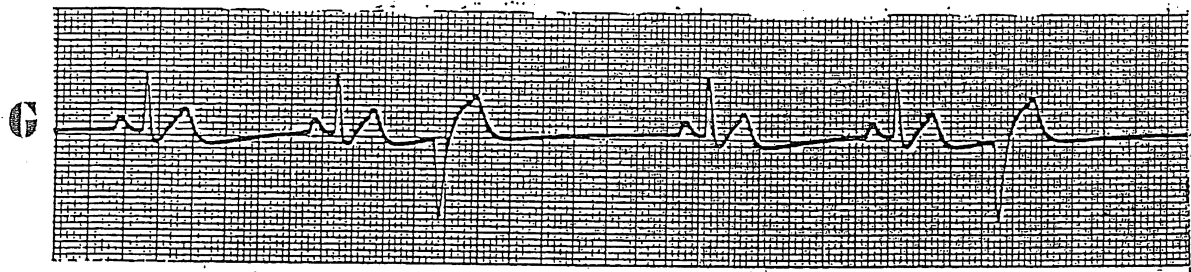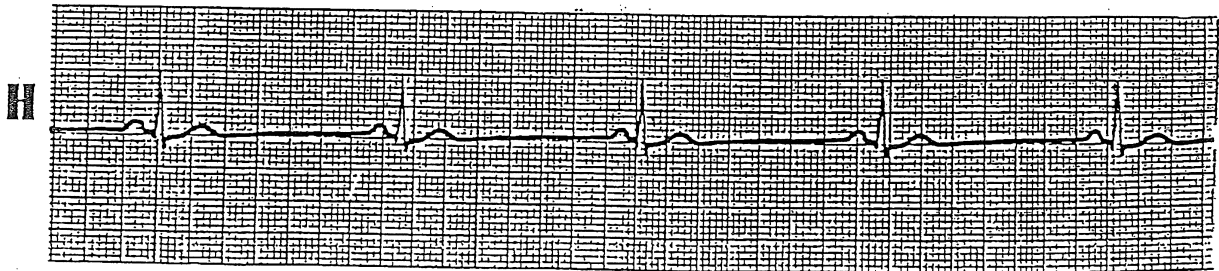

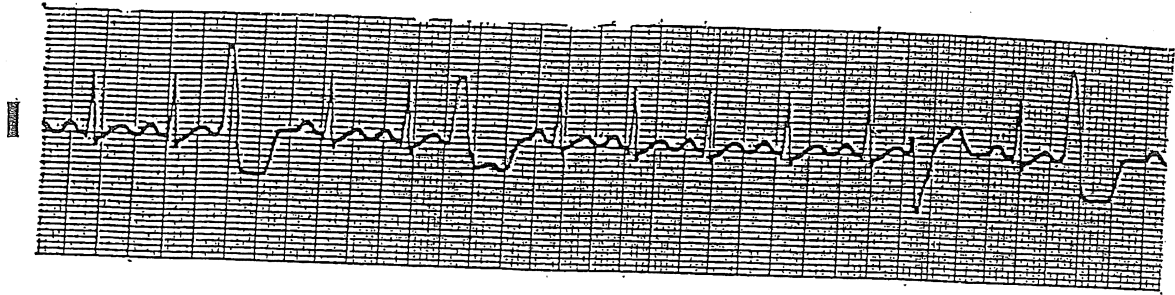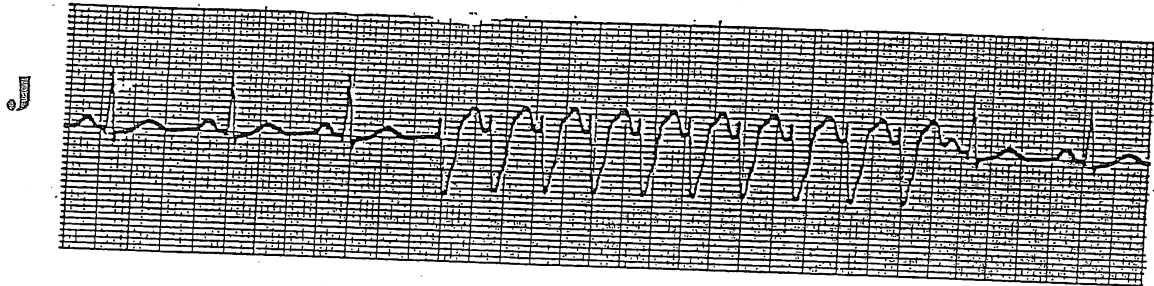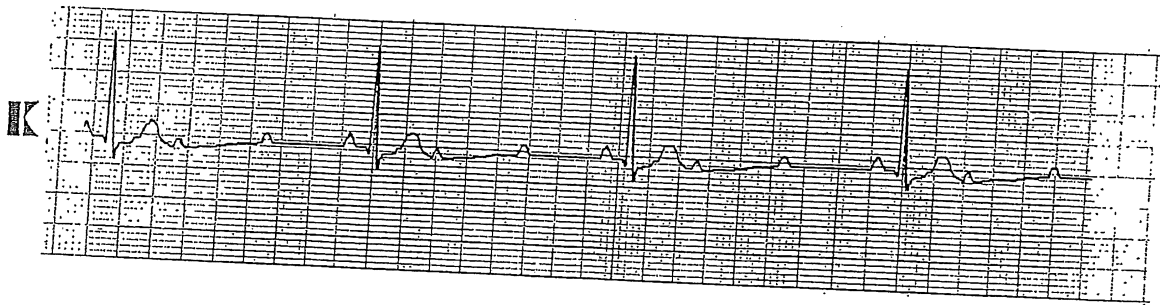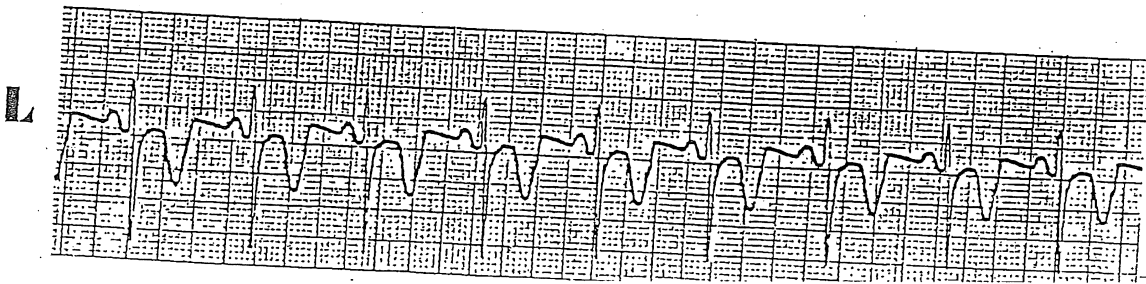

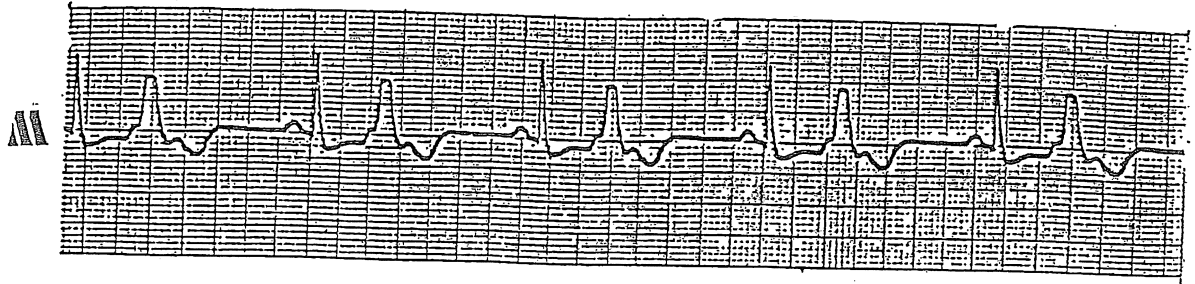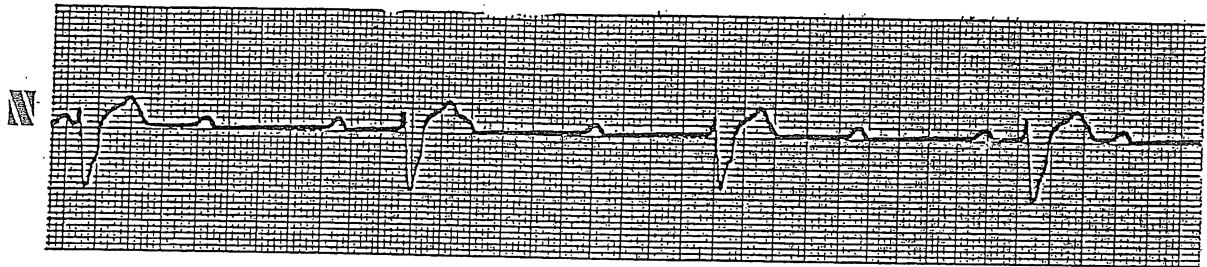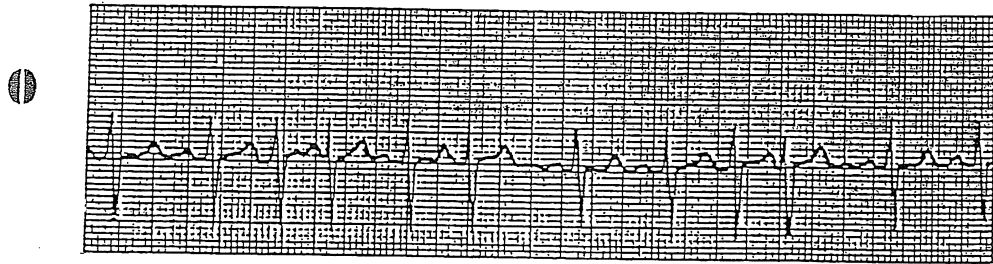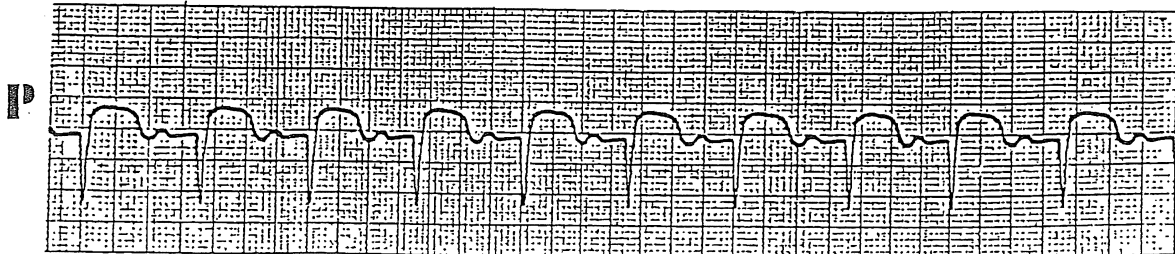

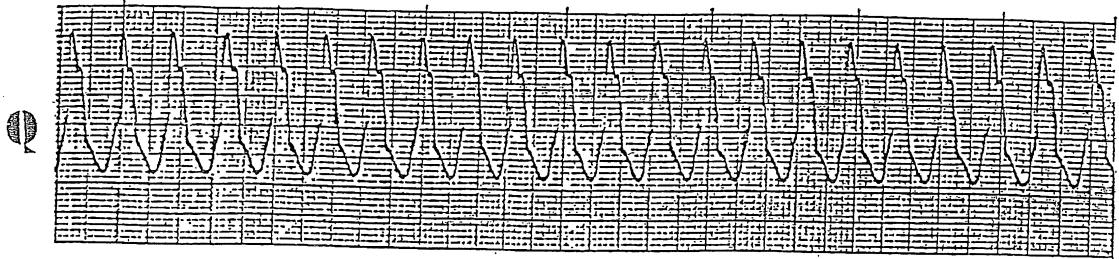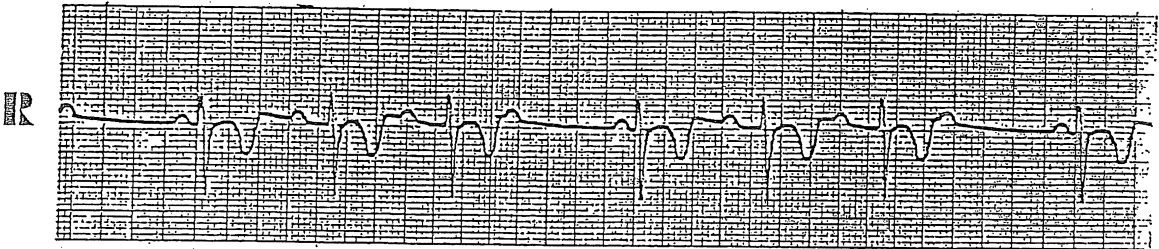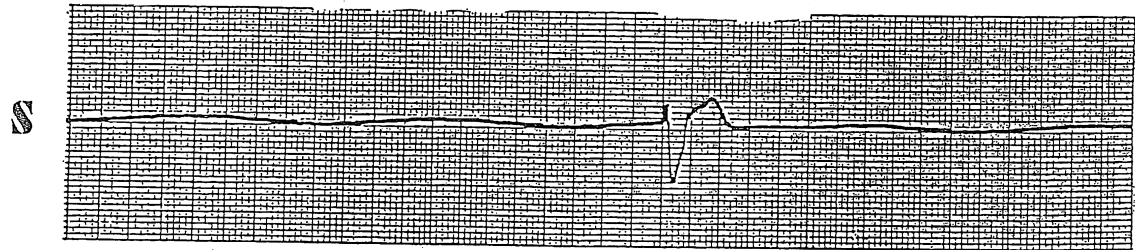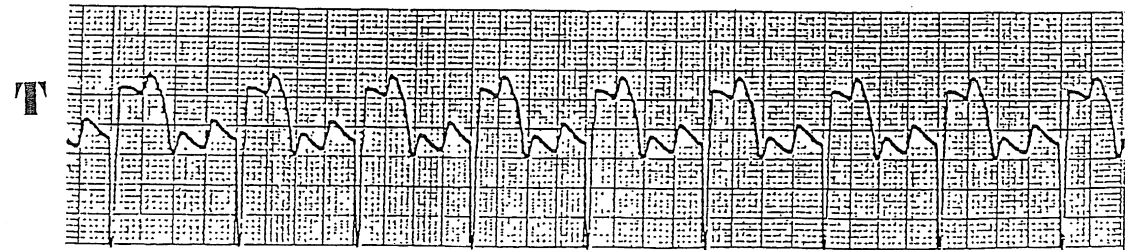

Supplement: jeehp-13-11-app1.pdf [file jeehp-13-11-app1.pdf]
